# Supplementary material for: Navigating the Landscape: A Comprehensive Review of Current Virus Databases
Source: MDPI journal article supplement (doi:10.3390/v15091834), 2023-08-29
Supplement: s1 [file s1]

**Supplementary Materials:**

**Table S1.** This table presents the status of virus databases and tools reviewed by Sharma et al. in 2015 [22]. For each database, data on availability, last update, URL, and citation are listed. Of the 50 virus databases listed in the original paper, 20 are not reachable, and only 11 have been updated since 2022. The number of citations were collected in January 2023. <sup>a</sup>: all these databases were merged into BVVRC; <sup>b</sup>: the website does not contain the promised data; <sup>c</sup>: the website does not load anymore (tested for 5 minutes, on different days); <sup>d</sup>: no update since creation; "-" = Not Available

| Website                            | Acc             | Up-date           | URL                                                                                                                             | Num. of citation |
|------------------------------------|-----------------|-------------------|---------------------------------------------------------------------------------------------------------------------------------|------------------|
| AVPdb                              | Yes             | 2013              | <a href="http://crdd.osdd.net/servers/avpdb">http://crdd.osdd.net/servers/avpdb</a>                                             | 171 [91]         |
| bNAbber                            | No              | -                 | <a href="http://bnaber.org">http://bnaber.org</a>                                                                               | 88 [92]          |
| CAPiHd                             | No              | -                 | <a href="http://bioinfo-dbb.nhri.org.tw/capih">http://bioinfo-dbb.nhri.org.tw/capih</a>                                         | 71 [93]          |
| CoVDB                              | No <sup>c</sup> | -                 | <a href="http://covdb.microbiology.hku.hk">http://covdb.microbiology.hku.hk</a>                                                 | 62 [94]          |
| DPVweb                             | Yes             | 2013              | <a href="http://www.dpvweb.net/">http://www.dpvweb.net/</a>                                                                     | 92 [95]          |
| EpiFlu                             | No              | -                 | <a href="http://platform.gisaid.org">http://platform.gisaid.org</a>                                                             | 3890 [48–50]     |
| euHCVdb                            | Yes             | 2011              | <a href="http://euhcvdb.ibcp.fr">http://euhcvdb.ibcp.fr</a>                                                                     | 161 [96]         |
| EuResist                           | Yes             | 2023              | <a href="http://www.euresist.org">http://www.euresist.org</a>                                                                   | 400 [55]         |
| FLAViDB                            | No <sup>c</sup> | -                 | <a href="http://cvc.dfci.harvard.edu/flavi/">http://cvc.dfci.harvard.edu/flavi/</a>                                             | 24 [97]          |
| Flavitrack                         | No <sup>c</sup> | -                 | <a href="http://carnot.utmb.edu/flavitrack">http://carnot.utmb.edu/flavitrack</a>                                               | 26 [98]          |
| HBVdb                              | Yes             | 2023              | <a href="https://hbvdb.lyon.inserm.fr/HBVdb/">https://hbvdb.lyon.inserm.fr/HBVdb/</a>                                           | 177 [57]         |
| HBVRegDB                           | No <sup>c</sup> | -                 | <a href="http://lancelot.otago.ac.nz">http://lancelot.otago.ac.nz</a>                                                           | 40 [99]          |
| HERVd                              | Yes             | 2021              | <a href="http://herv.img.cas.cz">http://herv.img.cas.cz</a>                                                                     | 110 [100]        |
| HESAS                              | Yes             | 2004              | <a href="http://www.primat.or.kr/HESAS">http://www.primat.or.kr/HESAS</a>                                                       | 21 [101]         |
| HIPdb                              | Yes             | 2013 <sup>d</sup> | <a href="http://crdd.osdd.net/servers/hipdb">http://crdd.osdd.net/servers/hipdb</a>                                             | 75 [102]         |
| HIV Drug Resistance DB             | No              | -                 | <a href="http://hivdb.stanford.edu">http://hivdb.stanford.edu</a>                                                               | 935 [56]         |
| HIV Positive Selection Mutation DB | No              | -                 | <a href="http://fold.doe-mbi.ucla.edu/HIV/">http://fold.doe-mbi.ucla.edu/HIV/</a>                                               | 35 [103]         |
| HIVsirDB                           | No <sup>c</sup> | 2011              | <a href="http://crdd.osdd.net/raghava/hivsir/">http://crdd.osdd.net/raghava/hivsir/</a>                                         | 45 [104]         |
| HIV Systems Biology                | No              | -                 | <a href="http://hivsystemsbiology.org">http://hivsystemsbiology.org</a>                                                         | 19 [105]         |
| HTLV-1 Molecular Epidemiology DB   | Yes             | 2012 <sup>d</sup> | <a href="http://htlv1db.bahia.fiocruz.br">http://htlv1db.bahia.fiocruz.br</a>                                                   | 13 [106]         |
| HVDB                               | Yes             | 2021              | <a href="http://s2as02.genes.nig.ac.jp">http://s2as02.genes.nig.ac.jp</a>                                                       | 63 [107]         |
| ICTV                               | Yes             | 2023              | <a href="https://ictv.global">https://ictv.global</a>                                                                           | 929 [30,31]      |
| IRD <sup>a</sup>                   | Yes             | -                 | <a href="http://www.fludb.org">http://www.fludb.org</a>                                                                         | 327 [108]        |
| ISED                               | No              | -                 | <a href="http://influenza.cdc.go.kr">http://influenza.cdc.go.kr</a>                                                             | 19 [109]         |
| IVDBd                              | No              | -                 | <a href="http://influenza.big.ac.cn">http://influenza.big.ac.cn</a>                                                             | 74 [110]         |
| LANL HCV Database                  | Yes             | 2014              | <a href="http://hcv.lanl.gov">http://hcv.lanl.gov</a>                                                                           | 519 [111,112]    |
| LANL HFV Database                  | Yes             | 2015              | <a href="http://hfv.lanl.gov">http://hfv.lanl.gov</a>                                                                           | 26 [113]         |
| LANL HIV Database                  | Yes             | 2023              | <a href="http://hiv.lanl.gov">http://hiv.lanl.gov</a>                                                                           | 208 [53,54]      |
| NCBI-HHPID                         | Yes             | 2017              | <a href="http://www.ncbi.nlm.nih.gov/RefSeq/HIVInteractions">http://www.ncbi.nlm.nih.gov/RefSeq/HIVInteractions</a>             | [93,114,115]     |
| NCBI-IVR                           | Yes             | 2023              | <a href="http://www.ncbi.nlm.nih.gov/genomes/FLU/">http://www.ncbi.nlm.nih.gov/genomes/FLU/</a>                                 | 1101 [116]       |
| NCBI Viral Genome                  | Yes             | 2023              | <a href="http://www.ncbi.nlm.nih.gov/genomes/VIRUSES/viruses.html">http://www.ncbi.nlm.nih.gov/genomes/VIRUSES/viruses.html</a> | 511 [38]         |
| NCBI-VVR                           | Yes             | 2023              | <a href="http://www.ncbi.nlm.nih.gov/genomes">http://www.ncbi.nlm.nih.gov/genomes</a>                                           | 44 [117]         |
| OpenFluDB                          | Yes             | 2010 <sup>d</sup> | <a href="http://openflu.vital-it.ch">http://openflu.vital-it.ch</a>                                                             | 45 [118]         |
| PaVE                               | Yes             | 2023              | <a href="http://pave.niaid.nih.gov">http://pave.niaid.nih.gov</a>                                                               | 285 [58]         |
| PBRC                               | No <sup>b</sup> | -                 | <a href="http://www.poxvirus.org">http://www.poxvirus.org</a>                                                                   | 69 [119]         |
| PhEVER                             | Yes             | 2010              | <a href="http://pbil.univ-lyon1.fr/databases/phever/help.html">http://pbil.univ-lyon1.fr/databases/phever/help.html</a>         | 10 [120]         |
| phiSITE                            | Yes             | 2010              | <a href="http://www.phisite.org/">http://www.phisite.org/</a>                                                                   | 117 [121,122]    |
| RNA Virus Database                 | No              | -                 | <a href="http://tree.bio.ed.ac.uk/rnavirusdb">http://tree.bio.ed.ac.uk/rnavirusdb</a>                                           | 21 [123]         |
| Subviral RNA Database              | No <sup>c</sup> | -                 | <a href="http://subviral.med.uottawa.ca">http://subviral.med.uottawa.ca</a>                                                     | 101 [124]        |
| VBRC                               | No              | -                 | <a href="http://www.vbrc.org/">http://www.vbrc.org/</a>                                                                         |                  |
| VGDB                               | No              | -                 | <a href="http://athena.bioc.uvic.ca/genomes/index.html">http://athena.bioc.uvic.ca/genomes/index.html</a>                       | 35 [125]         |
| VIPERdb                            | Yes             | 2023              | <a href="http://viperdbscripps.edu">http://viperdbscripps.edu</a>                                                               | 457 [33,34]      |
| ViPR <sup>a</sup>                  | Yes             | 2023              | <a href="https://legacy.viprbrc.org/brc/home.spg?decorator=vipr">https://legacy.viprbrc.org/brc/home.spg?decorator=vipr</a>     | 624 [126]        |
| ViralORFeome                       | No <sup>b</sup> | -                 | <a href="http://www.viralorfeome.com">http://www.viralorfeome.com</a>                                                           | 48 [127]         |
| ViralZone                          | Yes             | 2023              | <a href="http://www.expasy.org/viralzone/">http://www.expasy.org/viralzone/</a>                                                 | 422 [32]         |
| VirHostNet                         | No              | -                 | <a href="http://pbildb1.univ-lyon1.fr/virhostnet">http://pbildb1.univ-lyon1.fr/virhostnet</a>                                   | 164 [128]        |
| Vir-Mir db                         | Yes             | 2007              | <a href="http://alk.ibms.sinica.edu.tw">http://alk.ibms.sinica.edu.tw</a>                                                       | 106 [129]        |
| VirOligo                           | No              | -                 | <a href="http://virologo.okstate.edu/">http://virologo.okstate.edu/</a>                                                         | 28 [130]         |
| VIRsiRNAdb                         | Yes             | 2011 <sup>d</sup> | <a href="http://crdd.osdd.net/servers/virsiradb">http://crdd.osdd.net/servers/virsiradb</a>                                     | 50 [131]         |
| VirusMint                          | No              | -                 | <a href="http://mint.bio.uniroma2.it/virusmint/">http://mint.bio.uniroma2.it/virusmint/</a>                                     | 219 [132]        |

**Table S2.** This table displays the status of virus databases and tools reviewed by Mcleod and Upton in 2017 [23]. For each database, information on availability, last update, URL, and citations is listed. Of the 51 databases mentioned in the original paper under the category sequences databases, only 11 have been updated since 2022.

The number of citations was collected in January 2023. <sup>a</sup>: changed name/URL. "-" = Not Available

| Website                           | Acc | Update | URL                                                                                                                                                                     | Cite            |
|-----------------------------------|-----|--------|-------------------------------------------------------------------------------------------------------------------------------------------------------------------------|-----------------|
| ACLAME                            | No  | 2013   | <a href="http://aclame.ulb.ac.be/">http://aclame.ulb.ac.be/</a>                                                                                                         | 522 [133,134]   |
| ATIVS                             | No  | -      | <a href="http://influenza.nhri.org.tw/ATIVS/">http://influenza.nhri.org.tw/ATIVS/</a>                                                                                   | 18 [135]        |
| AVPdb                             | No  | -      | <a href="http://crdd.osdd.net/servers/avpdb/">http://crdd.osdd.net/servers/avpdb/</a>                                                                                   | 181 [91]        |
| AVPpred                           | No  | -      | <a href="http://crdd.osdd.net/servers/avppred/">http://crdd.osdd.net/servers/avppred/</a>                                                                               | 221 [136]       |
| bNAber                            | No  | -      | <a href="http://bnaber.org/">http://bnaber.org/</a>                                                                                                                     | 92 [92]         |
| CAPiH                             | No  | -      | <a href="http://bioinfo-dbb.nhri.org.tw/capih/">http://bioinfo-dbb.nhri.org.tw/capih/</a>                                                                               | 9 [137]         |
| COGs                              | Yes | 2021   | <a href="http://www.ncbi.nlm.nih.gov/COG/">http://www.ncbi.nlm.nih.gov/COG/</a>                                                                                         | 10519 [138–141] |
| Bat Assoc. Viruses <sup>a</sup>   | Yes | 2023   | <a href="http://www.mgc.ac.cn/DBatVir/">http://www.mgc.ac.cn/DBatVir/</a>                                                                                               | 14 [43]         |
| euHCVdb                           | No  | -      | <a href="https://euhcvdb.ibcp.fr/euHCVdb/">https://euhcvdb.ibcp.fr/euHCVdb/</a>                                                                                         | 165 [96]        |
| euresist                          | Yes | 2023   | <a href="http://www.euresist.org/web/guest">http://www.euresist.org/web/guest</a>                                                                                       | 59 [142]        |
| ExPASy                            | Yes | -      | <a href="http://www.expasy.org/">http://www.expasy.org/</a>                                                                                                             | 48 [143]        |
| FLAVIdb                           | No  | -      | <a href="http://cvc.dfci.harvard.edu/flavi/">http://cvc.dfci.harvard.edu/flavi/</a>                                                                                     | 23 [97]         |
| HBVRegDB                          | No  | -      | <a href="http://lancelot.otago.ac.nz/HBVRegDB/">http://lancelot.otago.ac.nz/HBVRegDB/</a>                                                                               | 38 [99]         |
| HCV DB Project                    | Yes | 2005   | <a href="http://hcv.lanl.gov/">http://hcv.lanl.gov/</a>                                                                                                                 | 519 [111,112]   |
| Hepatitis B Virus                 | No  | -      | <a href="https://hbvdb.ibcp.fr/">https://hbvdb.ibcp.fr/</a>                                                                                                             | 184 [57]        |
| Hepatitis Virus DB                | Yes | 2021   | <a href="http://s2as02.genes.nig.ac.jp/">http://s2as02.genes.nig.ac.jp/</a>                                                                                             | 63 [107]        |
| HFV/Ebola DB                      | Yes | 2015   | <a href="http://hfv.lanl.gov/">http://hfv.lanl.gov/</a>                                                                                                                 | 26 [113]        |
| HIPdb                             | No  | -      | <a href="http://crdd.osdd.net/servers/hipdb/">http://crdd.osdd.net/servers/hipdb/</a>                                                                                   | 79 [102]        |
| HIV Drug Resist.                  | Yes | 2023   | <a href="http://hivdb.stanford.edu/">http://hivdb.stanford.edu/</a>                                                                                                     | 1168 [144]      |
| HIV Sequence Database             | Yes | 2023   | <a href="http://www.hiv.lanl.gov/">http://www.hiv.lanl.gov/</a>                                                                                                         | 208 [53,54]     |
| HIV-1, Human Protein Interactions | Yes | 2017   | <a href="http://www.ncbi.nlm.nih.gov/genome/viruses/retro-viruses/hiv-1/interactions/">http://www.ncbi.nlm.nih.gov/genome/viruses/retro-viruses/hiv-1/interactions/</a> | 304 [93]        |
| HIVsirDB                          | No  | -      | <a href="http://crdd.osdd.net/raghava/hivsir/">http://crdd.osdd.net/raghava/hivsir/</a>                                                                                 | 45 [104]        |
| HTLV-1 Molecular EpidemiologyDB   | Yes | 2012   | <a href="http://htlv1db.bahia.fiocruz.br/">http://htlv1db.bahia.fiocruz.br/</a>                                                                                         | 13 [106]        |
| Influenza Resource                | Yes | 2023   | <a href="http://www.ncbi.nlm.nih.gov/genomes/FLU/">http://www.ncbi.nlm.nih.gov/genomes/FLU/</a>                                                                         | 1101 [116]      |
| IRD <sup>a</sup>                  | Yes | 2023   | <a href="http://www.fludb.org">http://www.fludb.org</a>                                                                                                                 | 327 [108]       |
| IRESite                           | Yes | 2019   | <a href="http://iresite.org/">http://iresite.org/</a>                                                                                                                   | 256 [145,146]   |
| IVDB                              | No  | -      | <a href="http://influenza.big.ac.cn/">http://influenza.big.ac.cn/</a>                                                                                                   | 74 [110]        |
| KISED                             | Yes | 2020   | <a href="http://influenza.cdc.go.kr/">http://influenza.cdc.go.kr/</a>                                                                                                   | 19 [109]        |
| NCBI Genomes                      | Yes | 2023   | <a href="http://www.ncbi.nlm.nih.gov/genome/viruses/">http://www.ncbi.nlm.nih.gov/genome/viruses/</a>                                                                   | 531 [38]        |
| OpenFlu database                  | Yes | -      | <a href="http://openflu.vital-it.ch/">http://openflu.vital-it.ch/</a>                                                                                                   | 45 [118]        |
| PaVE                              | Yes | 2023   | <a href="http://pave.niaid.nih.gov/">http://pave.niaid.nih.gov/</a>                                                                                                     | 285 [58]        |
| Phage Genomes                     | Yes | 2015   | <a href="http://www.ebi.ac.uk/genomes/phage.html">http://www.ebi.ac.uk/genomes/phage.html</a>                                                                           | -               |
| PhEVER                            | Yes | 2011   | <a href="http://pbil.univ-lyon1.fr/databases/phever/">http://pbil.univ-lyon1.fr/databases/phever/</a>                                                                   | 10 [120]        |
| phiSITE                           | Yes | 2014   | <a href="http://www.phisite.org">http://www.phisite.org</a>                                                                                                             | 117 [121,122]   |
| RNA Virus DB                      | No  | -      | <a href="http://bioafrica.mrc.ac.za/rnavirusdb/">http://bioafrica.mrc.ac.za/rnavirusdb/</a>                                                                             | 21 [123]        |
| SARS Cov Res.                     | Yes | 2023   | <a href="http://www.ncbi.nlm.nih.gov/genomes/SARS/">http://www.ncbi.nlm.nih.gov/genomes/SARS/</a>                                                                       | 329 [37]        |
| Subviral RNA                      | No  | -      | <a href="http://subviral.med.uottawa.ca/">http://subviral.med.uottawa.ca/</a>                                                                                           | 101 [124]       |
| Sugar Bind DB                     | Yes | 2018   | <a href="http://sugarbind.expasy.org/">http://sugarbind.expasy.org/</a>                                                                                                 | 45 [147]        |
| Repository for HBV Strain Data    | No  | -      | <a href="http://www.hpa-bioinformatics.org.uk/HepSEQ-Research/">http://www.hpa-bioinformatics.org.uk/HepSEQ-Research/</a>                                               | -               |
| VaZyMoLO                          | No  | -      | <a href="http://www.vazymolo.org/">http://www.vazymolo.org/</a>                                                                                                         | 45 [148]        |
| Virology.ca                       | No  | -      | <a href="http://www.virology.ca/">http://www.virology.ca/</a>                                                                                                           | -               |
| VIPERdb                           | Yes | 2023   | <a href="http://viperdb.scripps.edu/">http://viperdb.scripps.edu/</a>                                                                                                   | 457 [33,34]     |
| Vir-Mir Database                  | Yes | 2007   | <a href="http://alk.ibms.sinica.edu.tw/">http://alk.ibms.sinica.edu.tw/</a>                                                                                             | 106 [129]       |
| ViRAD                             | Yes | 2014   | <a href="http://www.firthlab.path.cam.ac.uk/virad.html">http://www.firthlab.path.cam.ac.uk/virad.html</a>                                                               | 86 [149]        |
| ViralDB - HUG                     | Yes | -      | <a href="http://cegg.unige.ch/viraldb/">http://cegg.unige.ch/viraldb/</a>                                                                                               | -               |
| ViRBase                           | No  | 2021   | <a href="http://www.rnasociety.org/virbase/">http://www.rnasociety.org/virbase/</a>                                                                                     | 9 [150]         |
| VirOligo                          | No  | -      | <a href="http://virologo.okstate.edu/">http://virologo.okstate.edu/</a>                                                                                                 | 28 [130]        |
| VIRsiRNAdb                        | No  | -      | <a href="http://crdd.osdd.net/servers/virsirnadb/">http://crdd.osdd.net/servers/virsirnadb/</a>                                                                         | 50 [131]        |
| ViPR <sup>a</sup>                 | Yes | 2023   | <a href="http://www.viprbrc.org">http://www.viprbrc.org</a>                                                                                                             | 624 [126]       |
| Virus Variation                   | Yes | 2017   | <a href="http://ncbi.nlm.nih.gov/genome/viruses/variation/">http://ncbi.nlm.nih.gov/genome/viruses/variation/</a>                                                       | 329 [37]        |
| VirusMint                         | No  | -      | <a href="http://mint.bio.uniroma2.it/virusmint/">http://mint.bio.uniroma2.it/virusmint/</a>                                                                             | 219 [132]       |

**Table S3.** Virus database characteristics are listed, including search features, download options, and methods of accessing the data. **Name:** The name or title of the platform or database. **Keyword Search:** Indicates whether the platform supports keyword search functionality. **Phrase Suggestion:** Indicates whether the platform provides phrase suggestion or auto-complete features. **Cross-Linking Data Pass:** Indicates whether the platform allows cross-linking of data or information to the other databases. **Shareable URL:** Indicates the possibility of access to the same results with sharing the URL address. **WEB API:** Indicates whether the platform generates the web pages via API. **Programmatic Access:** Indicates whether the platform allows programmatic access (API) to its data or services. **Export Results Table:** Indicates any export format of the search result table. **Download Options for Sequence:** Indicates the way to download sequence data (WEB, FTP, or API). **Source-Code Access:** Indicates whether the platform offers access to its source code. **One-Click to Download All:** Indicates whether the user is able to download all the platform data via a simple action. **Download Without Login:** Indicates whether the platform allows downloading without requiring user login or authentication. –: Not Applicable. <sup>a</sup>: CDP-File-Downloader is a tool to download ENA data from the COVID-19 Data Portal. <sup>b</sup>: there are predefined datasets per genotype to download as links.

| Name                     | Keyword Search | Phrase Suggestion | Cross-Linking Data Pass | Shareable URL | WEB API | Export Results Table | Download                        | Source-Code Access(GitHub) | One-Click to Download | Download Without Login |
|--------------------------|----------------|-------------------|-------------------------|---------------|---------|----------------------|---------------------------------|----------------------------|-----------------------|------------------------|
| ICTV                     | ☑              | ☒                 | ☑                       | ☑             | ☑       | ☑                    | WEB                             | ☑                          | all                   | ☑                      |
| ViralZone                | ☑              | ☑                 | ☑                       | ☑             | ☒       | ☒                    | –                               | ☒                          | –                     | –                      |
| VIPERdb                  | ☑              | ☒                 | ☑                       | ☑             | ☑       | ☑                    | WEB                             | ☒                          | one                   | ☑                      |
| Virus-Host DB            | ☑              | ☒                 | ☑                       | ☒             | ☒       | ☑                    | FTP                             | ☒                          | all                   | ☑                      |
| BV-BRC                   | ☑              | ☒                 | ☑                       | ☑             | ☑       | ☑                    | WEB, FTP, API                   | ☑                          | by selection          | ☑                      |
| NCBI Virus               | ☑              | ☑                 | ☑                       | ☑             | ☑       | ☑                    | WEB, API                        | ☒                          | all                   | ☑                      |
| NCBI Viral Genomes       | ☑              | ☒                 | ☑                       | ☑             | ☑       | ☑                    | WEB, FTP, API                   | ☒                          | one                   | ☑                      |
| RVDB                     | ☒              | ☒                 | ☒                       | ☒             | ☒       | ☑                    | WEB                             | ☑                          | all                   | ☑                      |
| VOGDB                    | ☑              | ☒                 | ☑                       | ☑             | ☒       | ☒                    | WEB, FTP                        | ☒                          | all                   | ☑                      |
| Virxicon                 | ☑              | ☑                 | ☑                       | ☑             | ☑       | ☑                    | WEB, API                        | ☒                          | by selection          | ☑                      |
| ZOVER                    | ☑              | ☒                 | ☑                       | ☑             | ☑       | ☑                    | WEB                             | ☒                          | by selection          | ☑                      |
| IMG/VR                   | ☑              | ☑                 | ☒                       | ☒             | ☑       | ☑                    | WEB, API                        | ☑                          | all                   | ☒                      |
| MVIP                     | ☑              | ☒                 | ☑                       | ☑             | ☒       | ☒                    | WEB                             | ☒                          | one                   | ☑                      |
| Viral Host Range DB      | ☑              | ☑                 | ☑                       | ☑             | ☒       | ☑                    | –                               | ☒                          | –                     | ☒                      |
| EpiCov (GISAID)          | ☑              | ☒                 | ☒                       | ☒             | ☒       | ☑                    | WEB                             | ☒                          | by selection          | ☒                      |
| The COVID-19 Data Portal | ☒              | ☑                 | ☑                       | ☑             | ☑       | ☑                    | WEB, FTP, API, CDP <sup>a</sup> | ☒                          | all                   | ☑                      |
| COVDB                    | ☒              | ☑                 | ☑                       | ☑             | ☑       | ☑                    | –                               | ☑                          | –                     | ☑                      |
| LANL HIV Database        | ☑              | ☒                 | ☑                       | ☒             | ☒       | ☒                    | WEB                             | ☒                          | by selection          | ☑                      |
| EuResist                 | –              | –                 | –                       | –             | –       | –                    | –                               | –                          | –                     | ☒                      |
| HIV Drug Resistance DB   | ☒              | ☑                 | ☑                       | ☑             | ☑       | ☑                    | WEB                             | ☑                          | one <sup>b</sup>      | ☑                      |
| HBVdb                    | ☒              | ☑                 | ☑                       | ☑             | ☒       | ☒                    | WEB                             | ☒                          | one                   | ☑                      |
| PaVE                     | ☑              | ☒                 | ☑                       | ☑             | ☑       | ☒                    | WEB, API                        | ☒                          | by selection          | ☑                      |
| NCBI VVR                 | ☑              | ☒                 | ☒                       | ☑             | ☑       | ☑                    | WEB, API                        | ☒                          | by selection          | ☑                      |
| PSD                      | ☒              | ☑                 | ☑                       | ☒             | ☒       | ☑                    | WEB                             | ☒                          | all                   | ☑                      |

**Table S4.** Here, all current coronavirus databases are listed.

| <b>Coronavirus databases</b>                                                                  |
|-----------------------------------------------------------------------------------------------|
| <a href="#">RCoV19</a>                                                                        |
| <a href="#">ICTRP</a>                                                                         |
| <a href="#">CoVDB</a>                                                                         |
| <a href="#">SARS-CoV-2 related structures</a>                                                 |
| <a href="#">RNAstructuromeDB</a>                                                              |
| <a href="#">SARS-CoV-2 MAT</a>                                                                |
| <a href="#">CoronaCentral</a>                                                                 |
| <a href="#">ESC</a>                                                                           |
| <a href="#">DBCovP</a>                                                                        |
| <a href="#">Ensembl COVID-19</a>                                                              |
| <a href="#">Coronavirus GenBrowser</a>                                                        |
| <a href="#">COKE</a>                                                                          |
| <a href="#">KGCov</a>                                                                         |
| <a href="#">hCoronavirusesDB</a>                                                              |
| <a href="#">SARS-CoV-2 Database</a>                                                           |
| <a href="#">COVID-19 Data Portal Spain</a>                                                    |
| <a href="#">COVID-19 SeroHub (SeroHub)</a>                                                    |
| <a href="#">National Center for Advancing Translational Sciences COVID-19 OpenData Portal</a> |
| <a href="#">The WHO Global Clinical Platform for COVID-19</a>                                 |
| <a href="#">Consortium for Clinical Characterization of COVID-19 by EHR(4CE)</a>              |
| <a href="#">ASH RC COVID-19 Registry for Hematology</a>                                       |
| <a href="#">Pregnancy CoRonavIrus Outcomes RegIsTrY (PRIORITY)</a>                            |
| <a href="#">COVID-19 Registry</a>                                                             |
| <a href="#">The COVID-19 and Cancer Consortium (CCC19)</a>                                    |
| <a href="#">COVID-19 CVD Registry</a>                                                         |
| <a href="#">COVID-19 Dermatology registry</a>                                                 |
| <a href="#">Global Registry of COVID-19 in Pediatric Cancer</a>                               |
| <a href="#">MS Global Data-Sharing Initiative</a>                                             |
| <a href="#">ASCO Survey on COVID-19 in Oncology (ASCO) Registry</a>                           |
| <a href="#">Discovery VIRUS COVID-19 Registry</a>                                             |
| <a href="#">Dutch National COVID-19 metadata portal(COVID-NL metadata)</a>                    |
| <a href="#">Dutch National COVID-19 clinical data portal (COVID-NL clinical data)</a>         |
| <a href="#">COVID-19 Host Genetics Initiative (COVID-19 hg)</a>                               |
| <a href="#">Canadian VirusSeq Data Portal(CVDP)</a>                                           |
| <a href="#">Database of publications on coronavirus disease (COVID-19)</a>                    |
| <a href="#">Surveillance Epidemiology of Coronavirus (COVID19) Under Research Exclusion</a>   |
| <a href="#">NCBI SARS-CoV</a>                                                                 |
| <a href="#">COViMS</a>                                                                        |
| <a href="#">Surveillance Epidemiology of Coronavirus (COVID19) Under Research Exclusion</a>   |
| <a href="#">Biobanque québécoise de la COVID-19</a>                                           |
| <a href="#">National COVID Cohort Collaborative</a>                                           |
| <a href="#">John Hopkins Coronavirus Resource</a>                                             |
| <a href="#">LitCovid</a>                                                                      |
| <a href="#">The COVID-19 Data Portal</a>                                                      |
| <a href="#">CORDITE</a>                                                                       |
| <a href="#">VirHostNet 3.0</a>                                                                |

**Table S5.** The table displays the full evaluation of the FAIR criteria and includes the data source used for the databases listed in the current review. Please refer to the [S1](#) for the full descriptions of each FAIR subcriteria. Note that some of the databases were not included in the FAIR evaluation due to the lack of a comparable table. The URLs behind the database names are clickable and lead to the data sources from each databases. 0=no, 1=yes.

| Name                                   | F1 | F2 | F3 | F4 | A1 | A1.1 | A1.2 | A2 | I1 | I2 | I3 | R1 | R1.1 | R1.2 | R1.3 |
|----------------------------------------|----|----|----|----|----|------|------|----|----|----|----|----|------|------|------|
| <a href="#">ICTV</a>                   | 0  | 1  | 1  | 0  | 0  | 0    | 1    | 1  | 0  | 1  | 1  | 1  | 0    | 1    | 1    |
| <a href="#">ViralZone</a>              | 0  | 1  | 0  | 1  | 0  | 1    | 1    | 1  | 0  | 1  | 1  | 1  | 1    | 1    | 1    |
| <a href="#">VIPERdb</a>                | 1  | 1  | 1  | 1  | 1  | 1    | 1    | 1  | 0  | 0  | 1  | 1  | 0    | 1    | 1    |
| <a href="#">Virus-Host DB</a>          | 1  | 1  | 1  | 1  | 1  | 1    | 1    | 1  | 0  | 0  | 1  | 1  | 1    | 1    | 1    |
| <a href="#">BV-BRC</a>                 | 1  | 1  | 1  | 1  | 1  | 1    | 1    | 1  | 0  | 0  | 1  | 1  | 0    | 1    | 0    |
| <a href="#">NCBI Virus</a>             | 1  | 1  | 1  | 0  | 1  | 1    | 1    | 1  | 0  | 1  | 1  | 1  | 0    | 1    | 1    |
| NCBI Viral Genomes                     | –  | –  | –  | –  | –  | –    | –    | –  | –  | –  | –  | –  | –    | –    | –    |
| <a href="#">RVDB</a>                   | 0  | 1  | 0  | 0  | 0  | 0    | 1    | 1  | 0  | 0  | 0  | 0  | 0    | 1    | 0    |
| <a href="#">VOGDB</a>                  | 1  | 1  | 1  | 0  | 1  | 1    | 1    | 1  | 0  | 0  | 1  | 1  | 0    | 1    | 0    |
| <a href="#">Virxicon</a>               | 0  | 1  | 0  | 0  | 0  | 1    | 1    | 0  | 0  | 0  | 1  | 1  | 0    | 0    | 0    |
| <a href="#">ZOVER</a>                  | 0  | 1  | 0  | 0  | 0  | 0    | 0    | 1  | 0  | 0  | 1  | 1  | 0    | 0    | 0    |
| <a href="#">Viral Host Range DB</a>    | 0  | 1  | 1  | 0  | 1  | 1    | 1    | 1  | 0  | 0  | 1  | 1  | 0    | 1    | 0    |
| <a href="#">IMG/VR v4</a>              | 1  | 1  | 1  | 1  | 1  | 1    | 1    | 1  | 0  | 1  | 1  | 1  | 0    | 1    | 1    |
| <a href="#">MVIP</a>                   | 1  | 1  | 1  | 0  | 1  | 1    | 1    | 1  | 0  | 0  | 1  | 1  | 0    | 1    | 0    |
| <a href="#">EpiCov (GISAID)</a>        | 1  | 1  | 1  | 1  | 1  | 1    | 1    | 1  | 0  | 0  | 1  | 1  | 1    | 1    | 0    |
| <a href="#">Covid-19 Data Portal</a>   | 1  | 1  | 1  | 1  | 1  | 1    | 1    | 1  | 1  | 0  | 1  | 1  | 1    | 1    | 1    |
| <a href="#">COVDB</a>                  | 0  | 1  | 0  | 0  | 0  | 0    | 0    | 1  | 0  | 0  | 1  | 1  | 0    | 0    | 1    |
| <a href="#">LANL HIV Database</a>      | 0  | 1  | 1  | 0  | 0  | 0    | 0    | 1  | 0  | 1  | 1  | 1  | 0    | 1    | 0    |
| <a href="#">EuResist</a>               | –  | –  | –  | –  | –  | –    | –    | –  | –  | –  | –  | –  | –    | –    | –    |
| <a href="#">HIV Drug Resistance DB</a> | 0  | 1  | 0  | 0  | 0  | 0    | 0    | 1  | 0  | 1  | 1  | 1  | 0    | 1    | 1    |
| <a href="#">HBVDB</a>                  | 0  | 1  | 1  | 0  | 0  | 1    | 1    | 0  | 0  | 1  | 0  | 1  | 0    | 1    | 0    |
| <a href="#">PaVE</a>                   | 1  | 1  | 1  | 0  | 1  | 1    | 1    | 1  | 0  | 0  | 1  | 1  | 1    | 1    | 0    |
| <a href="#">NCBI VVR</a>               | 1  | 1  | 1  | 0  | 1  | 1    | 1    | 1  | 0  | 1  | 1  | 1  | 0    | 1    | 1    |
| <a href="#">PSD</a>                    | 0  | 1  | 0  | 0  | 1  | 1    | 1    | 1  | 1  | 0  | 1  | 0  | 0    | 0    | 0    |

**Table S6.** Here, various types of errors that can occur in the naming of viruses are shown, along with an example.

| Error type       | official name                      | additional names                   |
|------------------|------------------------------------|------------------------------------|
| Change of name   | Kutternvirus CBA120                | Escherichia virus CBA120           |
| Name extension   | Alphasphaerolipovirus HCIV1        | Haloarcula virus HCIV1             |
| Abbreviations    | Chimeric virus 14                  | CHIV14                             |
| Spelling mistake | Privet ringspot virus              | Privet ringsport virus             |
| Capitalization   | Escherichia phage Andreotti        | Escherichia phage andreotti        |
| Character error  | Human T-cell leukemia virus type I | Human T cell leukemia virus type 1 |

**Table S7.** This table provides an overview of the metadata availability for 9,763,946 virus genomes in the BV-BRC database. Each column corresponds to a specific metadata category, and the reported quantity represents the total count of records containing any value, including unclassified and undefined values. The selection of columns in this table was made from the available genome metadata in BV-BRC, considering their likelihood of providing comprehensive information suggested by Wagner *et al.* in 2021 [151] and Field *et al.* in 2008 [152]. The table suggests that in 71.43 % of the minimum metadata categories (10 out of 14 columns), BV-BRC provides data for over 50 % of the records.

| Column Name           | Quantity  | Percentage |
|-----------------------|-----------|------------|
| Collection Attributes |           |            |
| Collection Year       | 8,991,879 | 92.09 %    |
| Isolation Country     | 9,162,987 | 93.85 %    |
| Isolation Source      | 9,763,625 | ~100.00 %  |
| Host Common Name      | 9,151,228 | 93.72 %    |
| Database Crosslinks   |           |            |
| GenBank Accession     | 9,607,314 | 98.40 %    |
| Taxon Lineage ID      | 9,763,946 | 100.00 %   |
| Publication           | 830,653   | 8.51 %     |
| Species Variations    |           |            |
| Lineage               | 6,651,009 | 68.12 %    |
| Strain                | 6,765,991 | 69.30 %    |
| Subtype               | 961,142   | 9.84 %     |
| Segment               | 1,102,852 | 11.30 %    |
| Sequence Information  |           |            |
| Genome Length         | 9,735,932 | 99.71 %    |
| Genome Quality        | 94,154    | 0.96 %     |
| Genome Status         | 9,748,928 | 99.85 %    |

**Figure S1.** FAIR Evaluation Criteria from Reference with additional guidelines

Here the FAIR criteria are listed below. This information is exactly reproduced from the FAIR Principles website which can be found at <https://www.go-fair.org/fair-principles/>. Our interpretation of the FAIR criteria was enhanced by referring to the GoFAIR definitions, which can be found at <https://www.gofair.foundation>. **Findable.** The first step in (re)using data is to find them. Metadata and data should be easy to find for both humans and computers. Machine-readable metadata are essential for automatic discovery of datasets and services, so this is an essential component of the FAIRification process.

- F1 (Meta)data are assigned a globally unique and persistent identifier
- F2 Data are described with rich metadata (defined by R1 below)
- F3 Metadata clearly and explicitly include the identifier of the data they describe
- F4 (Meta)data are registered or indexed in a searchable resource

**Accessible.** Once the user finds the required data, she/he/they need to know how they can be accessed, possibly including authentication and authorisation.

- A1 (Meta)data are retrievable by their identifier using a standardised communications protocol
  - A1.1 The protocol is open, free, and universally implementable
  - A1.2 The protocol allows for an authentication and authorisation procedure, where necessary
- A2 Metadata are accessible, even when the data are no longer available

**Interoperable.** The data usually need to be integrated with other data. In addition, the data need to interoperate with applications or workflows for analysis, storage, and processing.

- I1 (Meta)data use a formal, accessible, shared, and broadly applicable language for knowledge representation.
- I2 (Meta)data use vocabularies that follow FAIR principles
- I3 (Meta)data include qualified references to other (meta)data

**Reusable.** The ultimate goal of FAIR is to optimise the reuse of data. To achieve this, metadata and data should be well-described so that they can be replicated and/or combined in different settings.

- R1 (Meta)data are richly described with a plurality of accurate and relevant attributes
  - R1.1 (Meta)data are released with a clear and accessible data usage license
  - R1.2 (Meta)data are associated with detailed provenance
  - R1.3 (Meta)data meet domain-relevant community standards

The principles refer to three types of entities: data (or any digital object), metadata (information about that digital object), and infrastructure. For instance, principle F4 defines that both metadata and data are registered or indexed in a searchable resource (the infrastructure component).

### Additional guidelines

For the current FAIR evaluation, the following guidelines were used to determine the FAIR scores of 1:compliance, and 0:no compliance: **Evaluation Notes:** **F1.** If the ID was INSDC and the database was INSDC this counts as yes; if it was something like "1,2,3" then no; **F2.** If metadata fields > 3 then yes; **F3.** If there was an id (not necessarily a global and persistent id) there then yes; **F4.** The database was considered the searchable resource; if there was a search bar and the entry could be found by id then yes; **A1.** If metadata available by the id (e.g. summary page and/or downloadable cvs etc) then yes; **A1.1.** (e.g. clicking a link); **A1.2.** If referring to public data resources, yes; **A2.** If publication, name, BioProjectID or other accession id was included in metadata then yes; **I1.** If metadata was in a formal language then yes; **I2.** If metadata used explicitly stated vocabularies then yes; or if the db was an official organization (NCBI/ENA/ICTV) and the metadata came from within then yes; **I3.** f links in metadata then yes; **R1.** If metadata fields > 3 then yes; **R2.** If license linked then yes; **R3.** If in publication or on website then yes; **R4.** Lack of community standards;

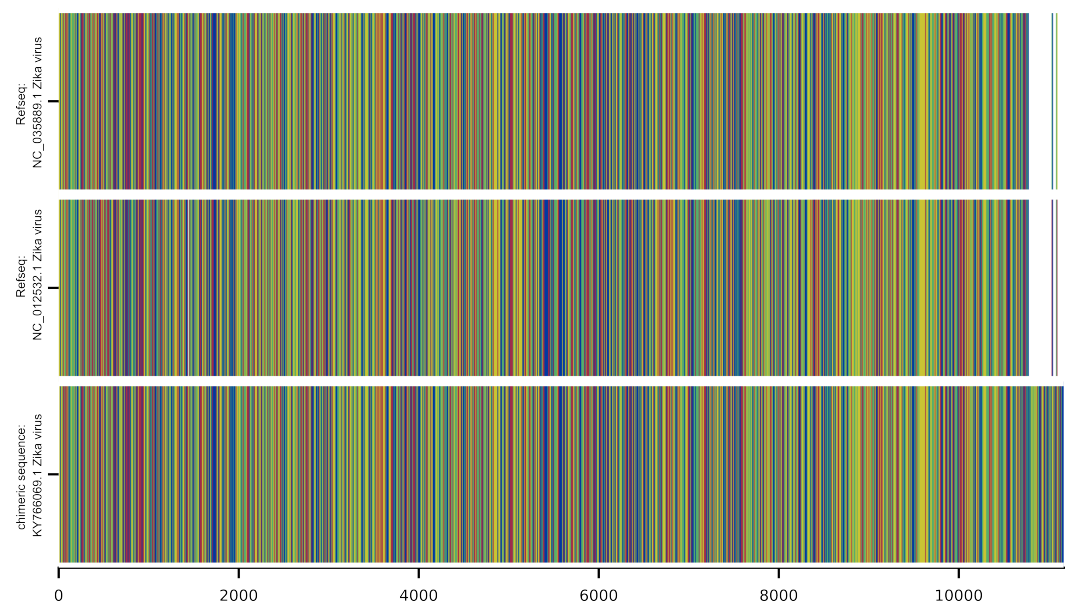

**Figure S2.** A schematic representation of the full genome alignment between the sequence of interest below and the two reference sequences of Zika (above) is shown here. The alignment was constructed using *Mafft* (v7.310) and visualized with *CIAalign*(1.0.18) [153,154]. Note that here the 3' end of the sequence of interest does not match with the reference sequences.
